# Supplementary material
Source: Springer Nature journal article supplement (https://www.springermedizin.de/resource/supplementary/12943_2014_1453_MOESM8_ESM.pdf/9553046)

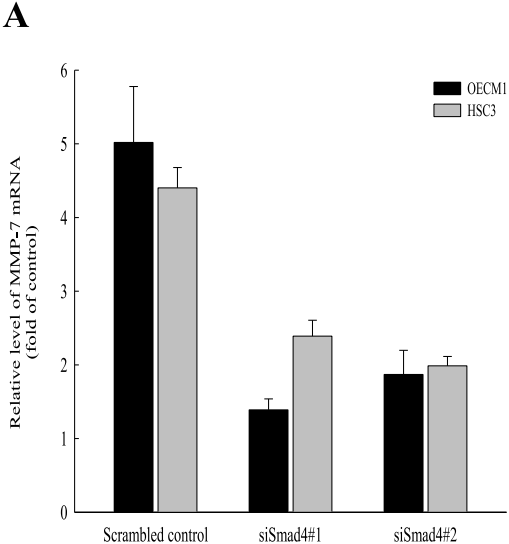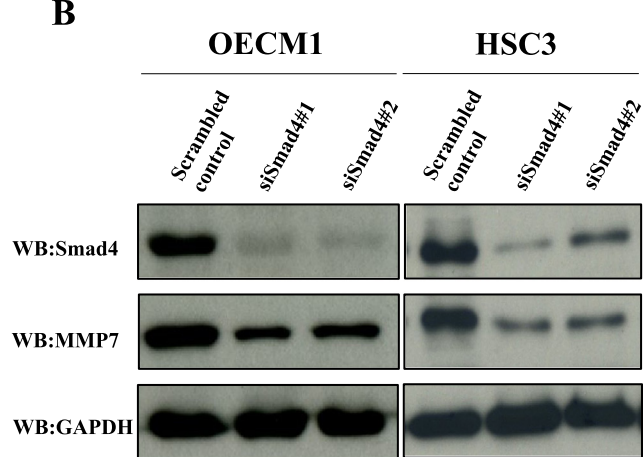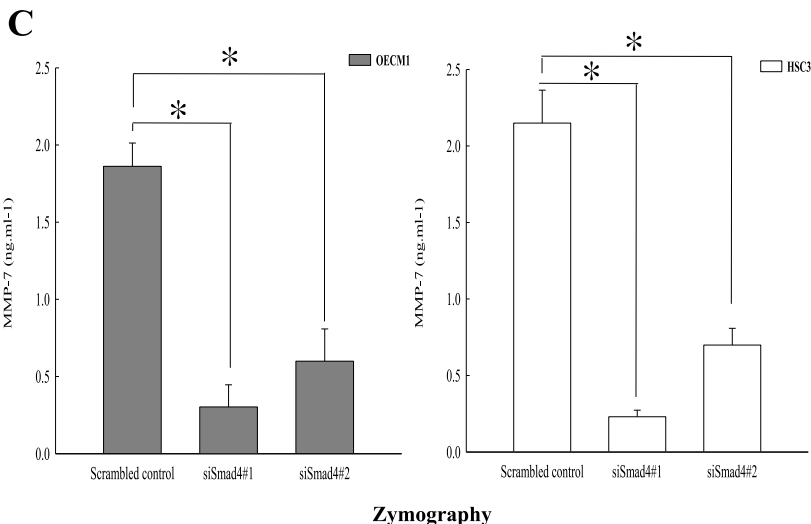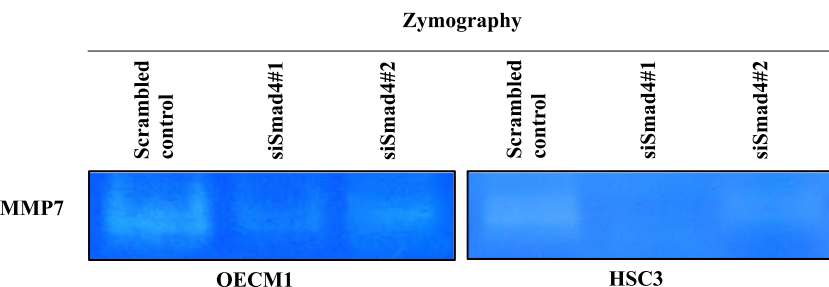

Supplement: MOESM8 [file 9553046]
